# Supplementary material for: Improvement of Carbonyl Groups and Surface Defects in Carbon Nanotubes to Activate Peroxydisulfate for Tetracycline Degradation
Source: MDPI journal article supplement (doi:10.3390/nano13010216), 2023-01-03
Supplement: s1 [file s1]

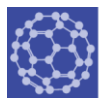

## Supplementary Materials

# Improvement of Carbonyl Groups and Surface Defects in Carbon Nanotubes to Activate Peroxydisulfate for Tetracycline Degradation

Wenxi Wang, Junjie Zhang, Zhiran Hou, Pei Chen, Xu Zhou, Wei Wang \*, Fatang Tan, Xinyun Wang and Xueliang Qiao

State Key Laboratory of Materials Processing and Die & Mould Technology, School of Materials Science and Engineering, Huazhong University of Science and Technology, Wuhan 430074, China

\* Correspondence: weiwang@hust.edu.cn; Tel./Fax: +86-27-87541540

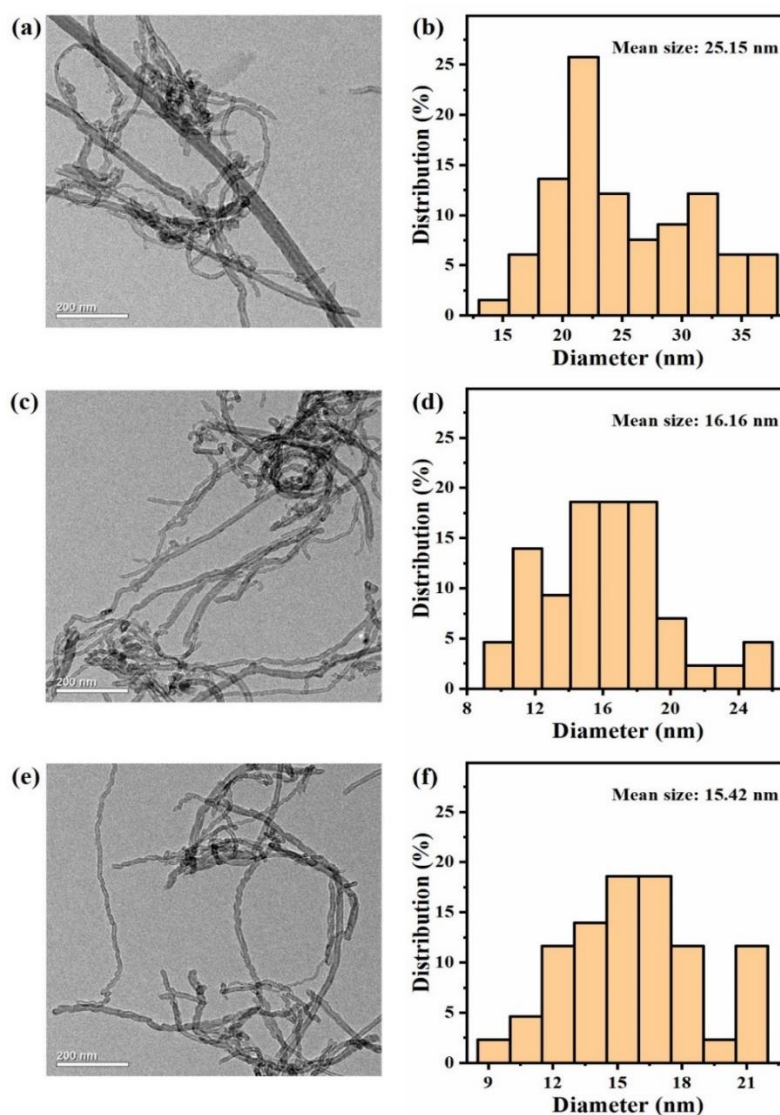

**Figure S1.** TEM images and corresponding diameter distributions of raw CNTs (a,b), CNT-O (c,d) and CNT-O-H (e,f).

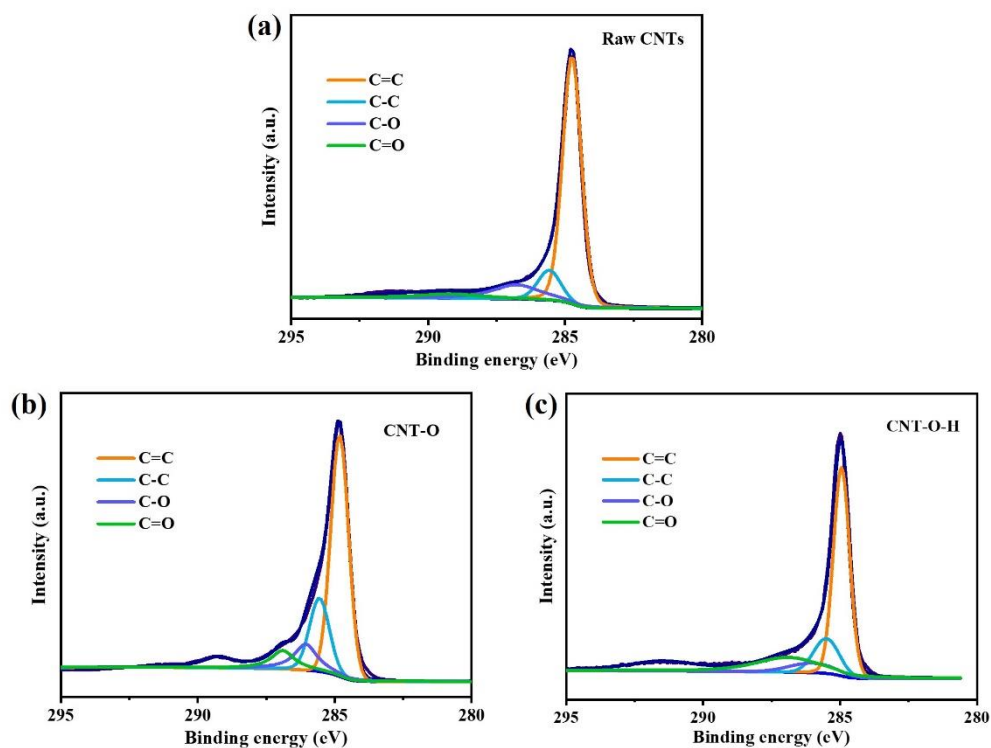

Figure S2. C 1 s spectra of raw CNTs (a), CNT-O (b) and CNT-O-H (c).

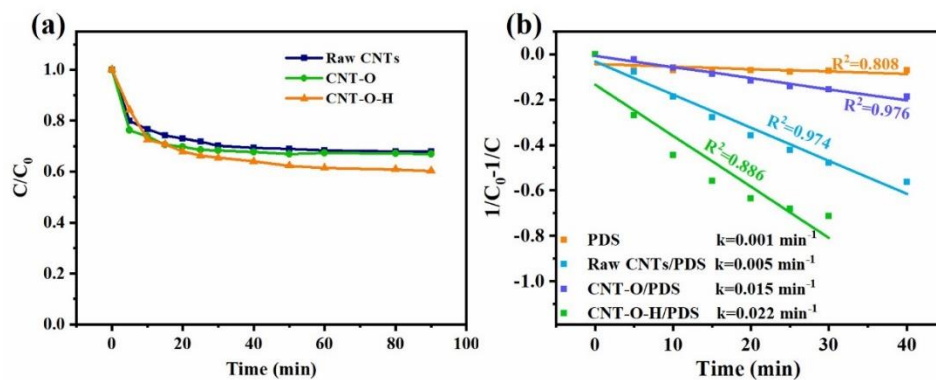

Figure S3. TC adsorption over CNTs, CNT-O and CNT-O-H (a) and pseudo-second-order kinetic fitting curves of TC degradation in different systems (b).

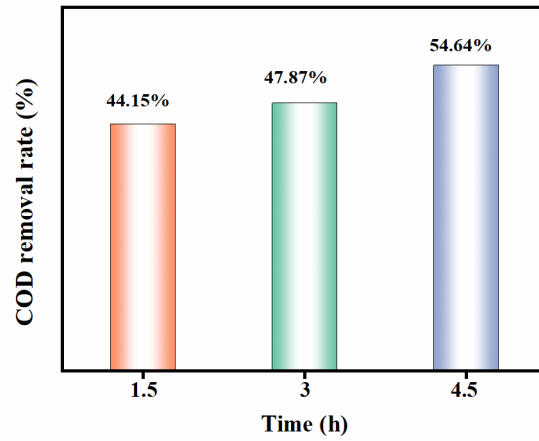

Figure S4. COD removal rates of CNT-O-H/PDS system at different time.

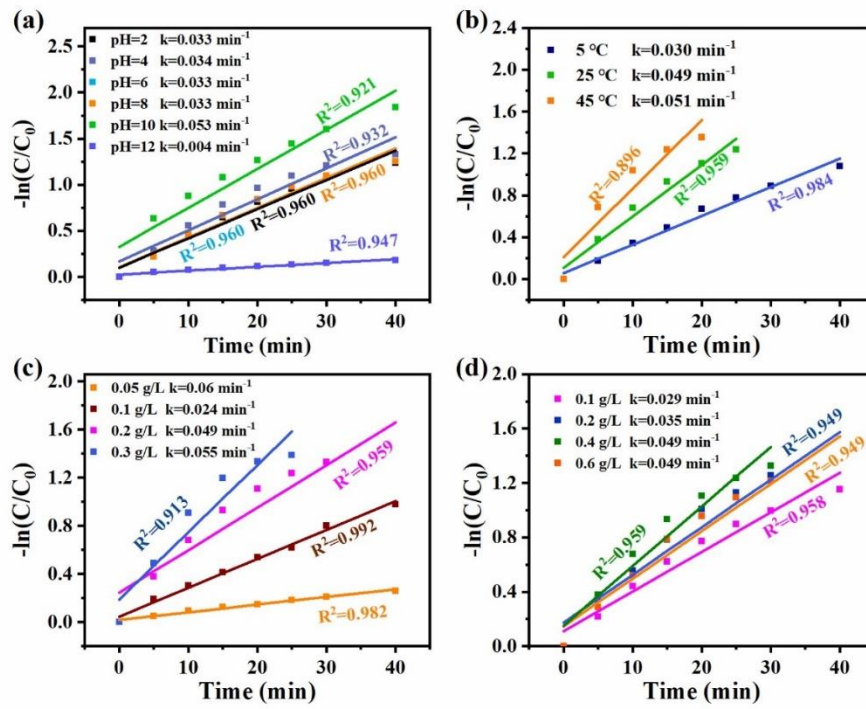

Figure S5. First-order kinetic curves of TC degradation under different initial pH (a), temperature (b), CNT-O-H dosage (c) and PDS dosage (d).

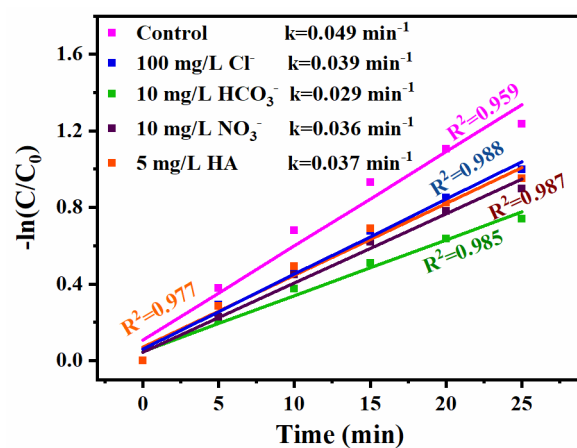

Figure S6. First-order kinetic curves of TC degradation with matrix species.

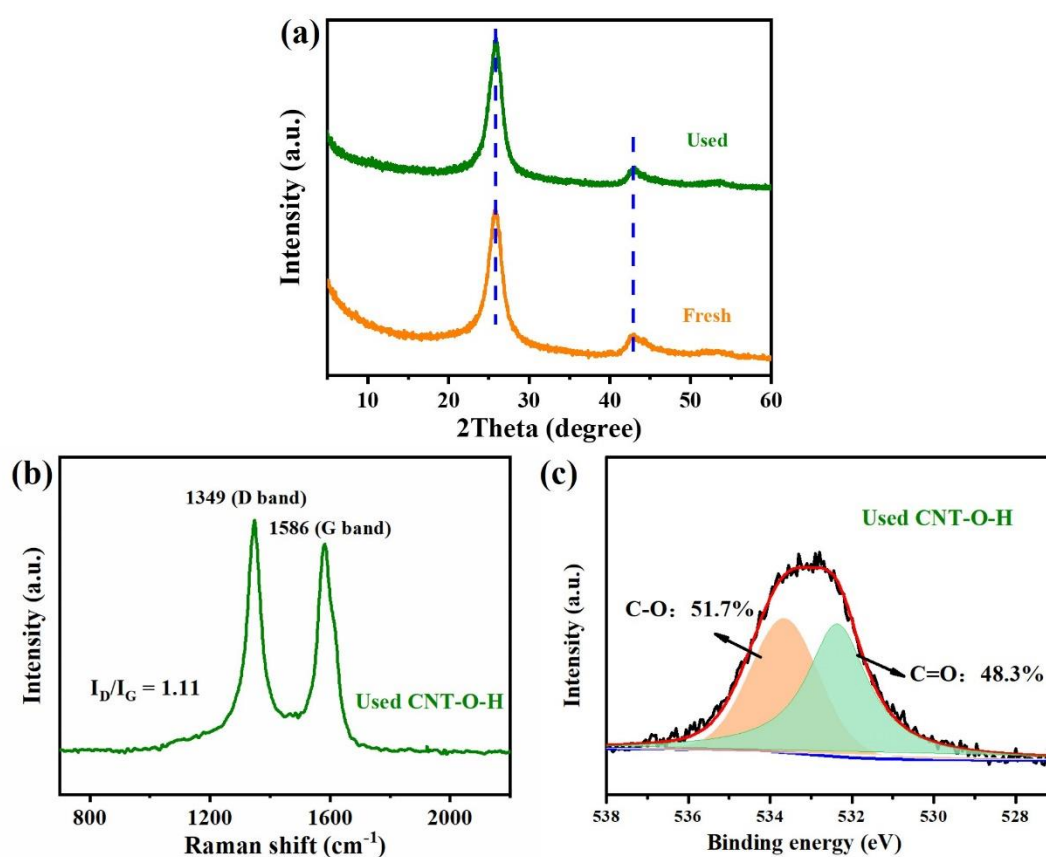

Figure S7. XRD pattern (a), Raman spectrum (b) and O 1s spectrum (c) of used CNT-O-H.

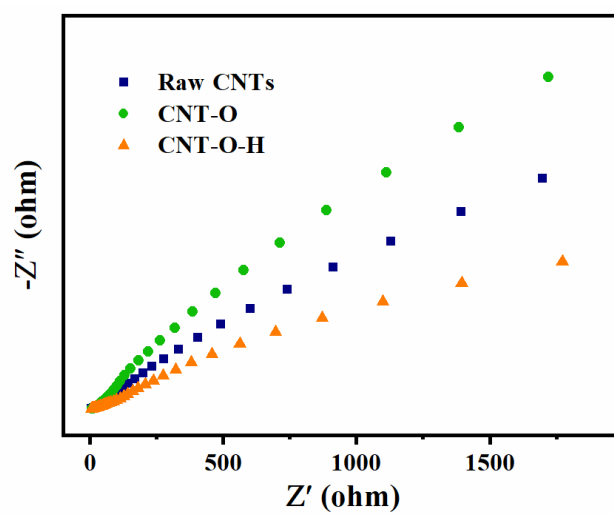

Figure S8. Impedances of raw CNTs, CNT-O and CNT-O-H.
